# Supplementary material for: Cranberry (Vaccinium macrocarpon) Extract Impairs Nairovirus Infection by Inhibiting the Attachment to Target Cells
Source: MDPI journal article supplement (doi:10.3390/pathogens10081025), 2021-08-13
Supplement: s1 [file s1]

## Supplementary Materials

|                                                                                     |                                                                                     |                                                                                      |                                                                                       |
|-------------------------------------------------------------------------------------|-------------------------------------------------------------------------------------|--------------------------------------------------------------------------------------|---------------------------------------------------------------------------------------|
| 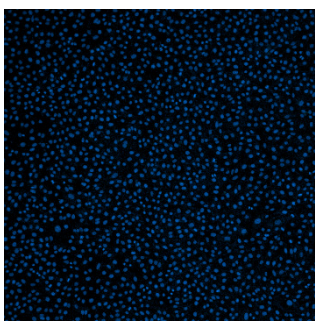   |    |    |    |
| Mock                                                                                | + HAZV + Oximacro 100<br>µg/mL                                                      | + HAZV + Oximacro 50<br>µg/mL                                                        | + HAZV + Oximacro 25<br>µg/mL                                                         |
|   |   |   |   |
| + HAZV + Oximacro 12.5<br>µg/mL                                                     | + HAZV + Oximacro 6.25<br>µg/mL                                                     | + HAZV + Oximacro 3.125<br>µg/mL                                                     | + HAZV + Oximacro 1.56<br>µg/mL                                                       |
|  |  |  |  |
| + HAZV + Oximacro 0.8<br>µg/mL                                                      | + HAZV + 0.4 Oximacro<br>µg/mL                                                      | + HAZV + Oximacro 0.2<br>µg/mL                                                       | + HAZV - Oximacro                                                                     |

**Figure S1.** Cranberry extract inhibits HAZV infection. Vero cells were treated with the cranberry extract at different concentrations throughout all the experiment, the infection was conducted with HAZV at a MOI of 0.005 FFU/cell.

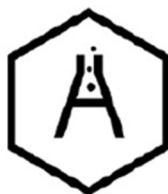

Work performed at:

**Alkemist Labs**

12661 Hoover Street  
Garden Grove, CA 92841  
714-754-HERB (4372)  
714-668-9972 (FAX)  
Sales@Alkemist.com  
www.Alkemist.com

## High Performance Thin-Layer Chromatography with Photo-Documentation

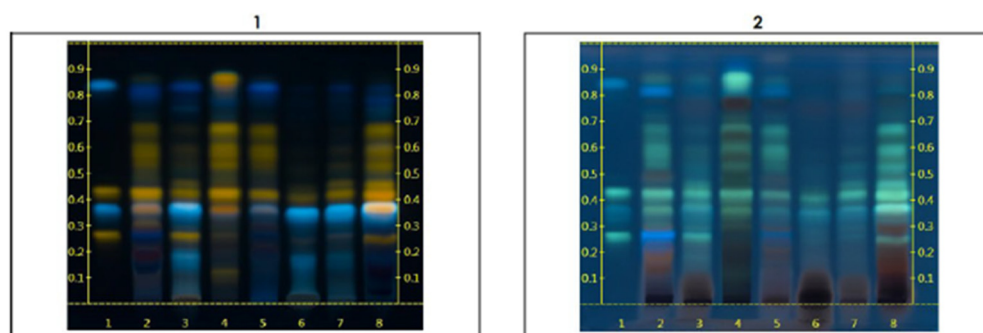

|                     |                                                                                                                                                                                                                                                                                                                                  |
|---------------------|----------------------------------------------------------------------------------------------------------------------------------------------------------------------------------------------------------------------------------------------------------------------------------------------------------------------------------|
| Plant Part:         | Fruit Juice                                                                                                                                                                                                                                                                                                                      |
| Sample Received:    | 02/14/20                                                                                                                                                                                                                                                                                                                         |
| Sample Packaging:   | Foil Pouch                                                                                                                                                                                                                                                                                                                       |
| Form of Botanical:  | powdered extract                                                                                                                                                                                                                                                                                                                 |
| Appearance:         | Fine powder                                                                                                                                                                                                                                                                                                                      |
| Lot Number:         | (CRP01-191002) → Lane 4(4μl)                                                                                                                                                                                                                                                                                                     |
| Sample:             | 20045XPH_1                                                                                                                                                                                                                                                                                                                       |
| Latin Name:         | <i>Vaccinium macrocarpon</i> Aiton [Ericaceae]                                                                                                                                                                                                                                                                                   |
| Reference Sample:   | Lane 2(10μl) (LQB15918AP1), Lane 8(10μl) (LQA17018NBTC1) <i>Vaccinium</i> sp. (fruit); Lane 3(10μl) (L11409SYN) <i>Vaccinium macrocarpon</i> (fruit); Lane 6(10μl) (KY06210AP1) <i>Vaccinium corymbosum</i> (fruit); Lane 7(10μl) (AAG18709UPL) <i>Vaccinium angustifolium</i> (fruit); held at Alkemist Labs, Garden Grove, CA. |
| Analyst:            | A. Davis, N. Afendikova, M. Edwards, S. Kabbaj, N. Hoang, K. Tran, J. Lopez, J. Mares 131733                                                                                                                                                                                                                                     |
| Sample Preparation: | 1g+10mL water, sonicate/heat at 50°C for 30 min. SPE condition with 5mL Methanol, equilibrate with 5mL water, load, dry, elute with 1mL Methanol(2x)                                                                                                                                                                             |
| Stationary Phase:   | Silica gel 60, HPTLC plates                                                                                                                                                                                                                                                                                                      |
| Mobile Phase:       | ethyl acetate: Acetic acid: Formic Acid: Water [10/0.9/0.9/2]                                                                                                                                                                                                                                                                    |
| Detection:          | (1) Natural Product + Polyethylene Glycol, 366nm (Reich, E., 2007)<br>(2) 10% Sulfuric, 100°C, 2min, 366nm (Reich, E., 2007)                                                                                                                                                                                                     |
| Reference Standard: | Lane 1(2μl) Chlorogenic Acid (11 1026/0, XSYN), Caffeic acid (1117/0, XSYN), Hyperoside (28 0702/0, XSYN), Rutin (A0348926, ACR), Methanol (0000206697, BDH)                                                                                                                                                                     |
| Reference Source:   | Method Developed by Alkemist Labs<br>IDT-SOP-72-01                                                                                                                                                                                                                                                                               |

**Comments & Conclusions:** Lane 4 is the test sample OXIMACRO/CRANBERRY EXT (CRP01-191002) Lanes 2, 3, 6, 7, 8 are the reference samples used for comparison. This test sample, OXIMACRO/CRANBERRY EXT (CRP01-191002) is consistent with the chromatographic profile of the reference samples of *Vaccinium* sp., used above. **This test sample OXIMACRO/CRANBERRY EXT (CRP01-191002) has characteristics of a customized extract derived from *Vaccinium* sp., juice.**

**Figure S2.** Authentication of the cranberry extract.

Supplementary results: The cranberry extract contains a high percentage of A-Type Proanthocyanidins.

The DMAC assay on the cranberry extract showed a 376.98 mg g<sup>-1</sup> (± 0.63) total PAC content which was characterized by 57% dimeric PAC-A; 21% trimeric PAC 1A,1B; 1% pentameric PAC 3A,1B, 11% pentameric PAC 2A,2B and 1% pentameric 1A,3B. These results indicate a high content of PAC-A of the cranberry extract used for this study.
